# Supplementary material for: Layer-by-layer assembly of porphyrin-based metal–organic frameworks on solids decorated with graphene oxide
Source: Royal Society of Chemistry journal article supplement (doi:10.1039/c6nj03202h), 2016-11-30
Supplement: c6nj03202h1.pdf [file c6nj03202h1.pdf]

Supporting Information

**Layer-by-layer Assembly of Porphyrin-Based Metal-Organic Frameworks on Solids Decorated with Graphene Oxide**

*Alexandra I. Zvyagina,<sup>a</sup> Andrey A. Shiryaev,<sup>a</sup> Alexander E. Baranchikov,<sup>b</sup> Vladimir V. Chernyshev,<sup>a,c</sup> Yulia Yu. Enakieva,<sup>a</sup> Oleg A. Raitman,<sup>a</sup> Alexander A. Ezhov,<sup>d,e</sup> Ivan N. Meshkov,<sup>a</sup> Dmitry A. Grishanov,<sup>b</sup> Olga S. Ivanova,<sup>b</sup> Yulia G. Gorbunova,<sup>a,b</sup> Vladimir V. Arslanov,<sup>a</sup> and Maria A. Kalinina<sup>a,f\*</sup>*

<sup>a.</sup> A. N. Frumkin Institute of Physical Chemistry and Electrochemistry, Russian Academy of Sciences, 31b4 Leninsky prospect, Moscow 119071, Russia.

<sup>b.</sup> N. S. Kurnakov Institute of General and Inorganic Chemistry, Russian Academy of Sciences, 31 Leninsky prospect, Moscow 119991, Russia.

<sup>c.</sup> Chemistry Department, M. V. Lomonosov Moscow State University, Leninskie Gory, GSP-1, Moscow 119991, Russia.

<sup>d.</sup> Faculty of Physics, M. V. Lomonosov Moscow State University, Leninskie Gory, GSP-1, Moscow 119991, Russia.

<sup>e.</sup> A. V. Topchiev Institute of Petrochemical Synthesis, Russian Academy of Sciences, 29 Leninsky prospect, Moscow 119991, Russia.

<sup>f.</sup> Department of Colloid Chemistry, Institute of Fine Chemical Technologies, Moscow Technological University, 86 Vernadsky Ave., Moscow 119571, Russia.

**S1 AFM study of the control GO film transferred from the air/hydrosol interface**

**S2 Spectroscopy data**

**S3 X-ray data**

**S4 Morphological studies**

**S5 References**

**S1 AFM study of the control GO film transferred from the air/hydrosol interface**

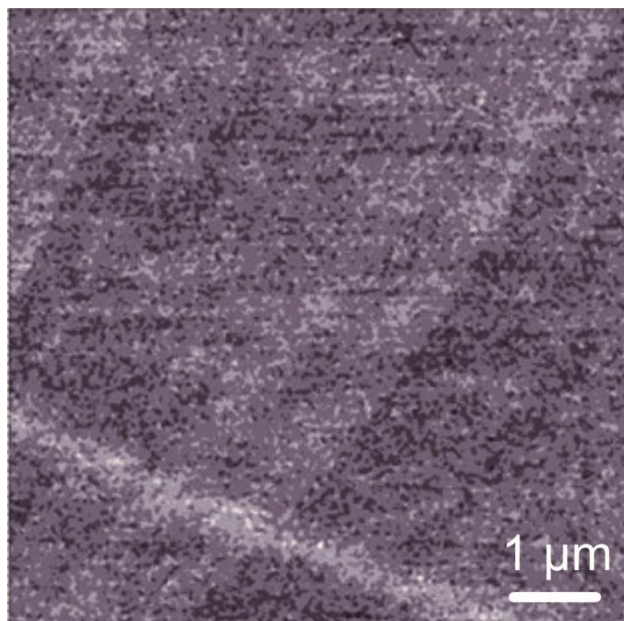

**Figure S1.** AFM image of the surface of freshly cleaved mica scanned after the immersion into the GO aqueous dispersion. No GO particles on the surface of the support were found.

## S2 Spectroscopy data

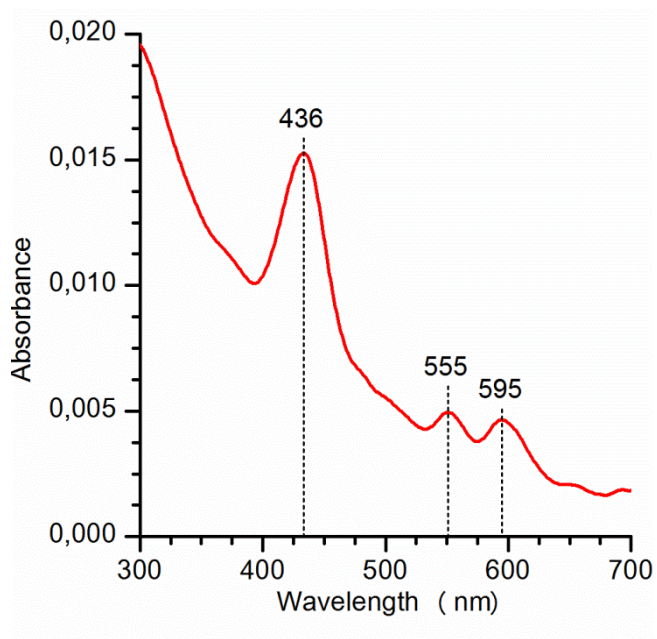

**Figure S2.** UV-vis spectrum of ZnTCPP layer deposited onto the GO-modified quartz glass.

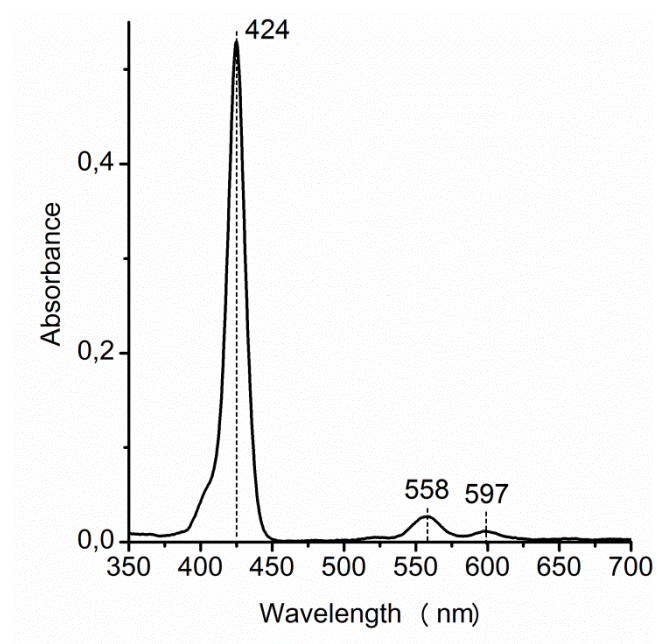

**Figure S3.** UV-vis spectrum of  $8 \cdot 10^{-6}$  M ZnTCPP solution in chloroform measured in 2 mm quartz cuvette.

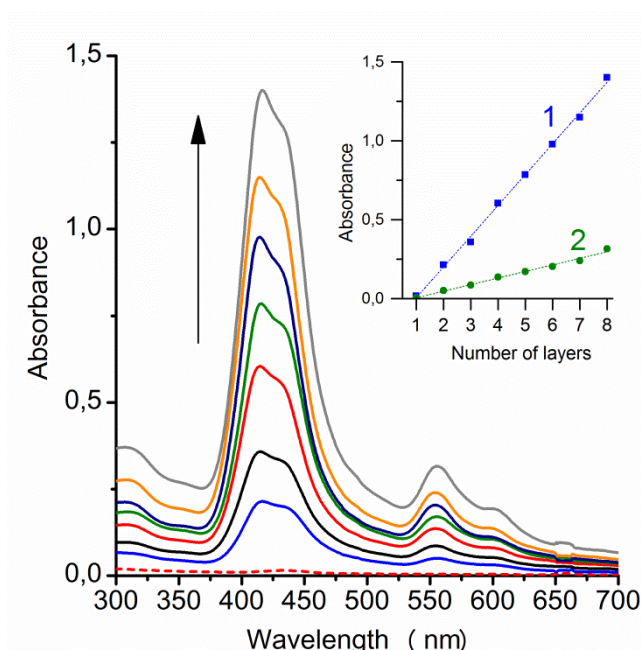

**Figure S4.** UV-vis spectra of SURMOF deposited onto the GO-modified quartz glass. The spectra were measured after deposition of every layer of ZnTCPP. The absorbance of SURMOF increased with a number of layers. Insert: UV-vis absorption intensity of the Soret band at 419 nm (1) and Q1-band at 557 nm (2) as a number of deposited layers.

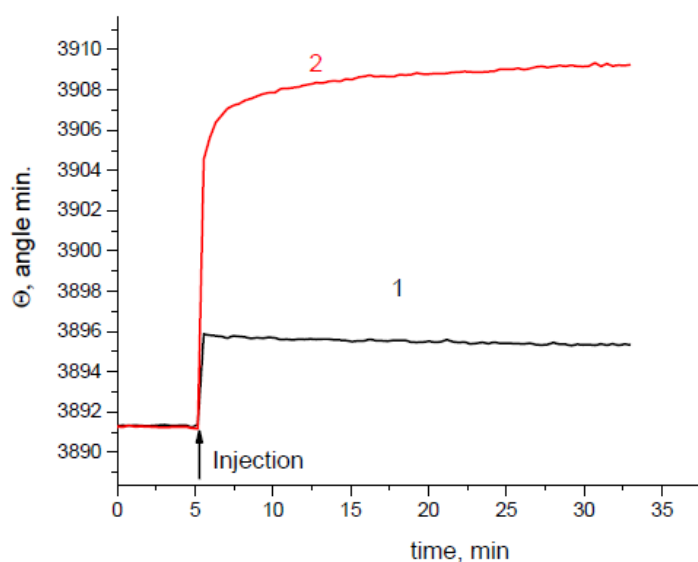

**Figure S5.** Full-recorded SPR sensograms for (1) 6-cycle SURMOF and (2) control film of ZnTCPP in 0.1 M solution of zinc acetate.

### S3 X-ray data

#### S3.1 X-ray diffraction of starting components

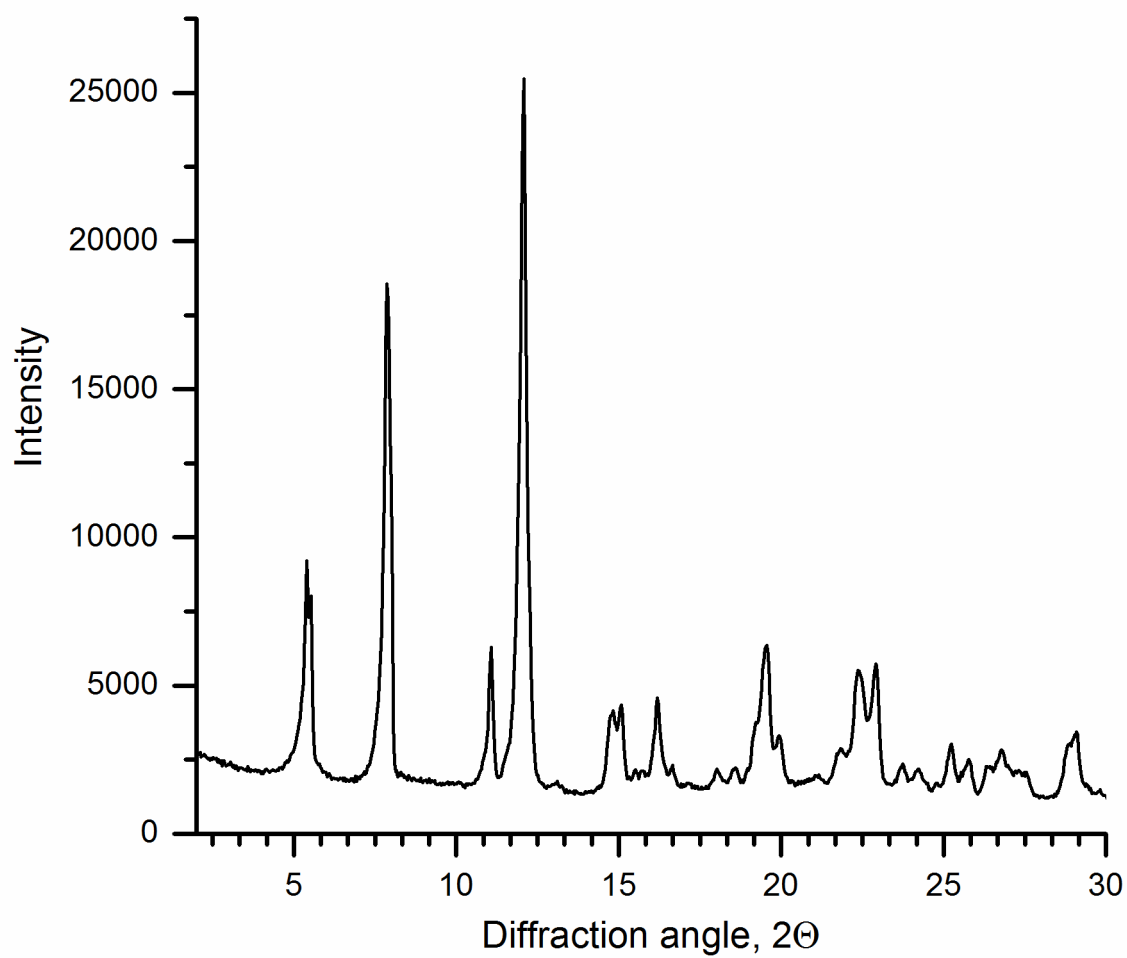

**Figure S6.** XRD for ZnTCPP.

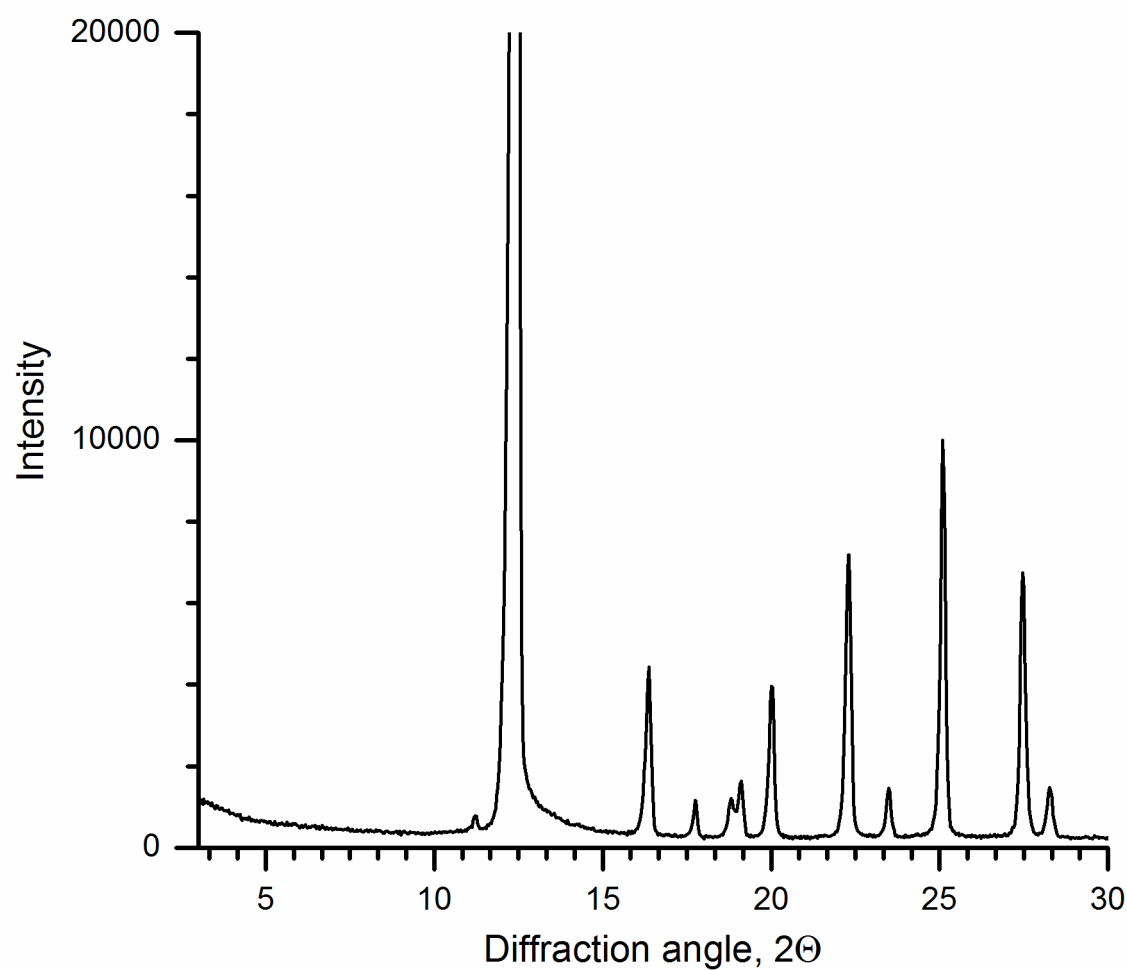

**Figure S7.** XRD for zinc acetate dihydrate.

### S3.2 Structures of MOF comprising ZnTCPP from Cambridge Crystallographic Data Centre (CCDC)

1. catena-(( $\square$ 8-5,10,15,20-tetrakis(4-carboxylatophenyl)porphyrinato)-triaqua-tri-zinc; unknown solvate), CCDC refcode WOPRUQ<sup>1</sup>;
2. (5,10,15,20-tetrakis(4-carboxyphenyl)porphyrinato)-bis(ethanol)-zinc, CCDC refcode JUXHUH<sup>2</sup>;
3. catena-(( $\square$ 5-5,10,15,20-tetrakis(4-carboxyphenyl)porphyrinato)-tetra-aqua-pyridine-tri-zinc pyridine solvate dihydrate), CCDC refcode EBAQOO<sup>3</sup>;

4. catena-(( $\square$ 9-5,10,15,20-tetrakis(4-carboxyphenyl)porphyrinato)-triaqua-tri-zinc N,N-diethylformamide solvate), CCDC refcode VUHJEO<sup>4</sup>;
5. catena-(( $\square$ 5-tetra(4-carboxyphenyl)porphyrin)-(ethylene glycol-O)-di-zinc ethylene glycol solvate), CCDC refcode WAWGOQ<sup>5</sup>.

#### S4 Morphological studies

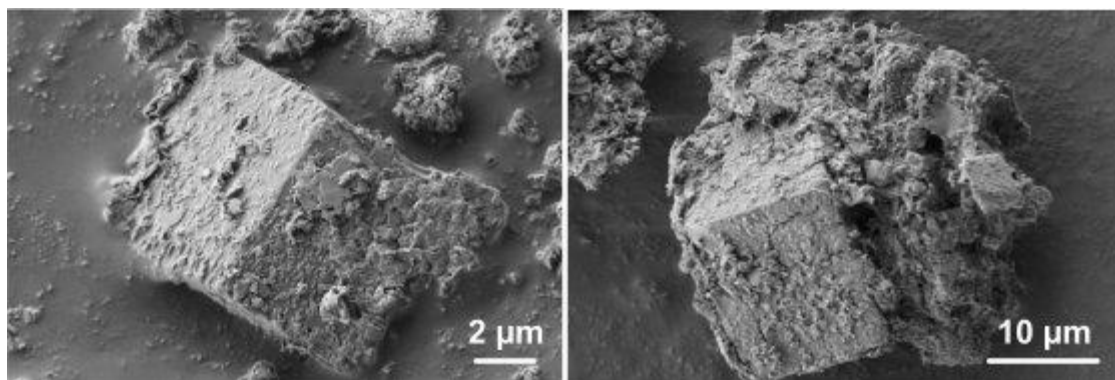

**Figure S8.** SEM image of ZnTCPP/ZnAc<sub>2</sub> powder immobilized on the surface of graphite tape. The material was synthesized in methanol according to the procedure described in <sup>4</sup>.

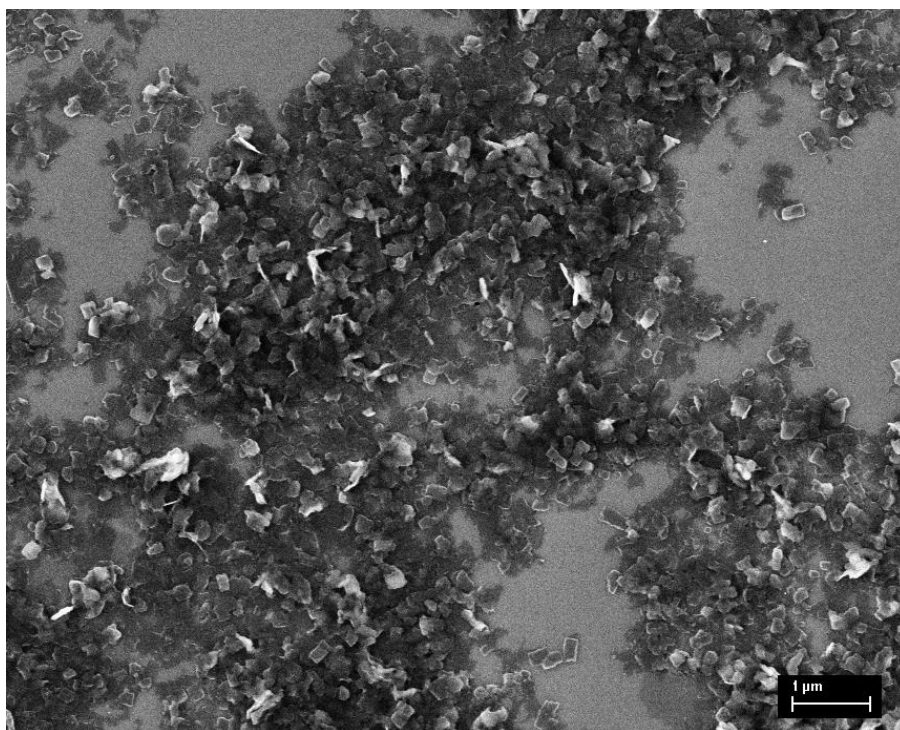

**Figure S9.** SEM image for the ZnTCPP/ZnAc<sub>2</sub>/GO surface coating obtained under solvothermal conditions.



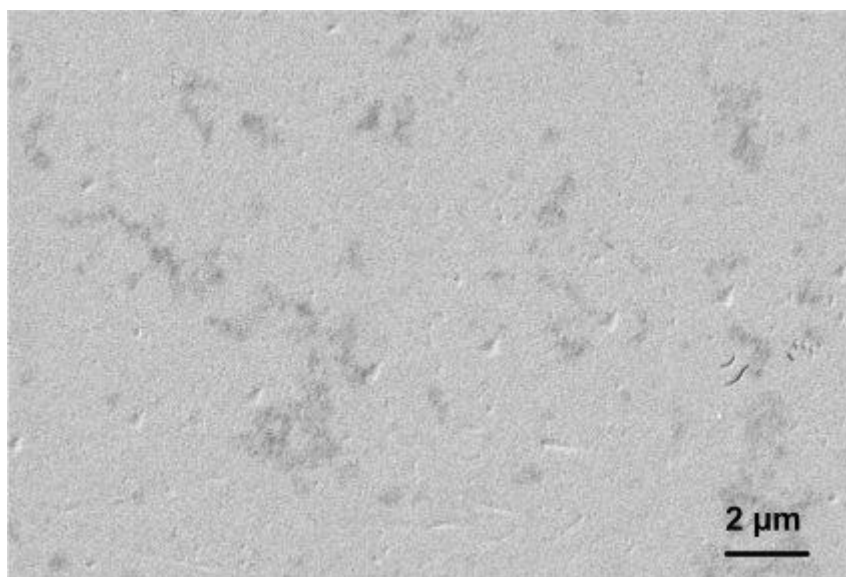

**Figure S10.** SEM image of the control film obtained through sequential L-b-L deposition of ZnTCPP and ZnAc<sub>2</sub> onto the quartz glass without GO.

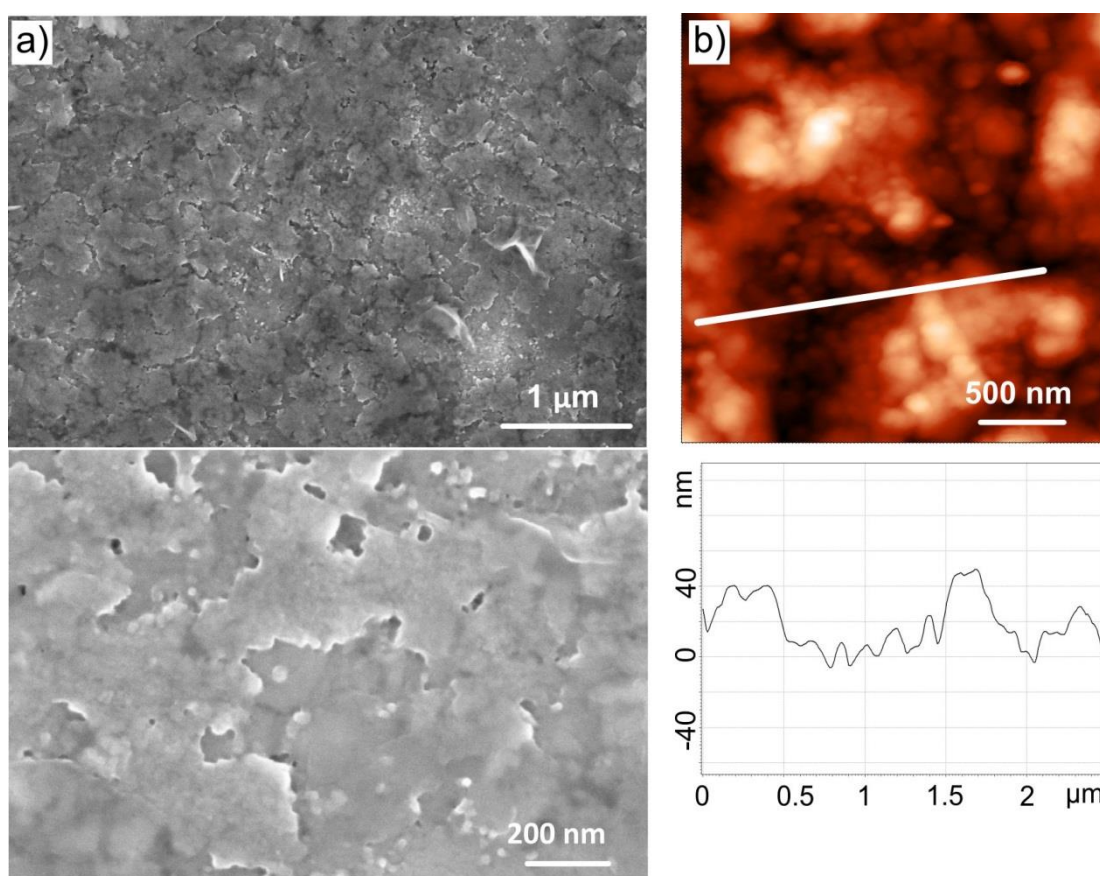

**Figure S11.** a) SEM and (b-c) ACM images and corresponding surface profiles for 20-layer ZnTCPP/ZnAc<sub>2</sub>/GO SURMOF film.



## S5 References

- 1 W. Lin, *Synth. React. Inorganic, Met. Nano-Metal Chem.*, 2016, **46**, 334–337.
- 2 M. Shmilovits, M. Vinodu and I. Goldberg, *Cryst. Growth Des.*, 2004, **4**, 633–638.
- 3 E.-Y. Choi, C. a. Wray, C. Hu and W. Choe, *CrystEngComm*, 2009, **11**, 553–5.
- 4 Y. Diskin-Posner, S. Dahal and I. Goldberg, *Chem. Commun.*, 2000, 585–586.
- 5 R. Makiura, R. Usui, E. Pohl and K. Prassides, *Chem. Lett.*, 2014, **43**, 1161–1163.
